# Supplementary material for: (1,4-Butyldiammonium)CdBr4: a layered organic–inorganic hybrid perovskite with a visible-blind ultraviolet photoelectric response
Source: Royal Society of Chemistry journal article supplement (doi:10.1039/c8qi00551f), 2018-01-01
Supplement: c8qi00551f1.pdf [file c8qi00551f1.pdf]

Supporting Information for

# (1,4-Butyldiammonium)CdBr<sub>4</sub>: A Layered Organic-Inorganic Hybrid Perovskite with Visible-blind Ultraviolet Photoelectric Response

*Yuyin Wang,<sup>ab</sup> Chengmin Ji,<sup>a</sup> Xitao Liu,<sup>a</sup> Shiguo Han,<sup>a</sup> Jing Zhang,<sup>a</sup> Zhihua Sun,<sup>\*a</sup> Asma Khan,<sup>ab</sup> and Junhua Luo<sup>\*,a</sup>*

*<sup>a</sup>State Key Laboratory of Structural Chemistry, Fujian Institute of Research on the Structure of Matter, Chinese Academy of Sciences, Fuzhou, Fujian 350002, P.R.China*

*<sup>b</sup>University of Chinese Academy of Sciences, Chinese Academy of Sciences, Beijing 100039, P.R. China*

*\*To whom correspondence should be addressed. E-mail: [sunzhihua@fjirsm.ac.cn](mailto:sunzhihua@fjirsm.ac.cn);*

*[jhluo@fjirsm.ac.cn](mailto:jhluo@fjirsm.ac.cn)*

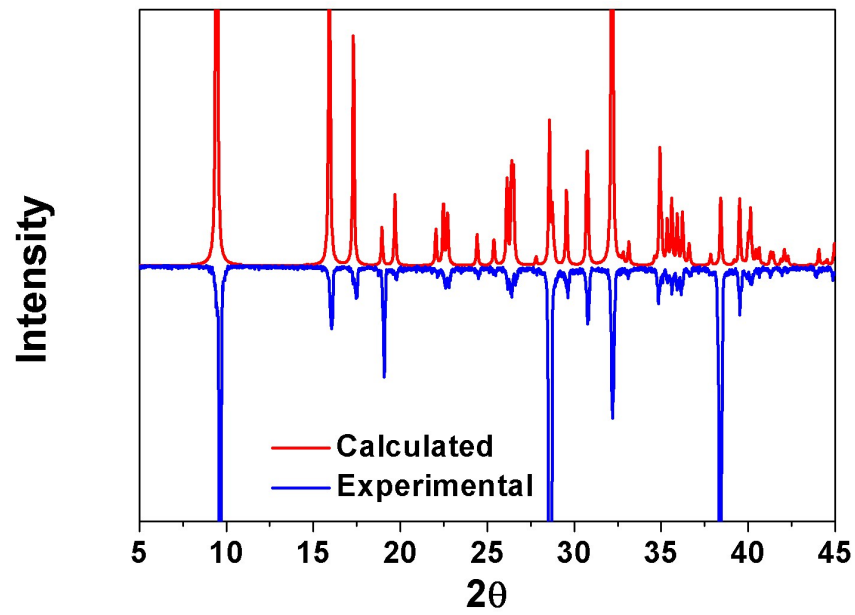

**Figure S1.** Powder X-ray Diffraction (PXRD) patterns of experimental data and the calculated data.

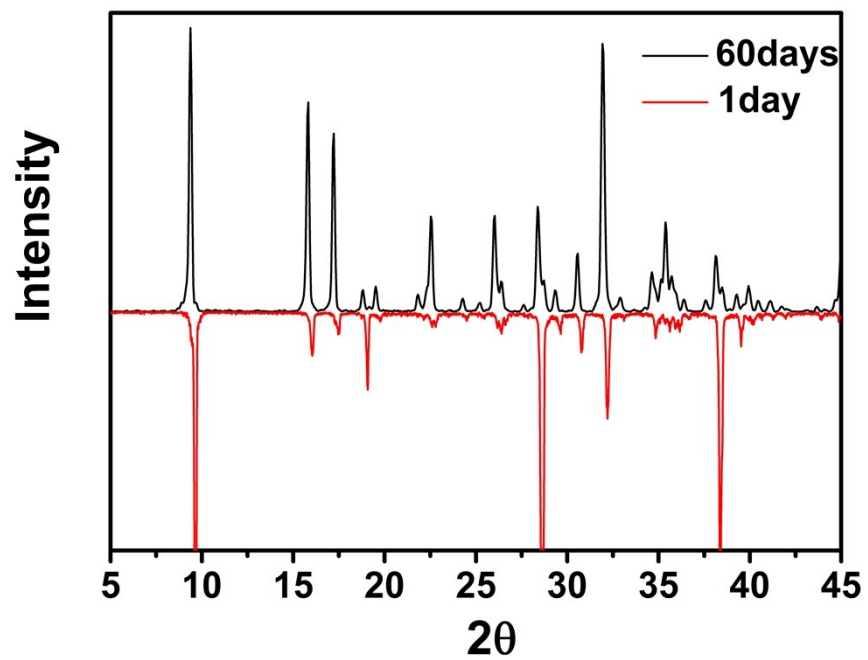

**Figure S2.** PXRD patterns of 1 recorded on the freshly - prepared sample (1 day) and after 60 days.

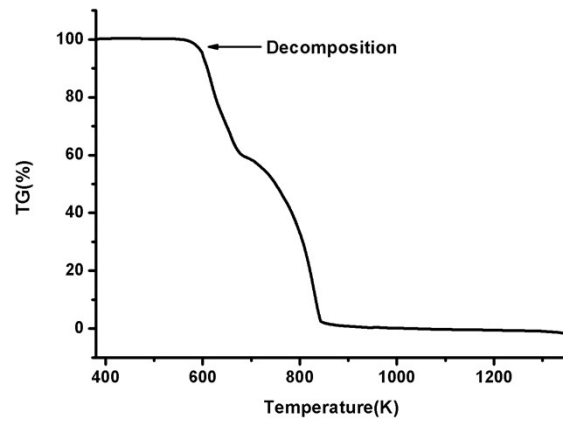

**Figure S3.** TG curves for **1**.

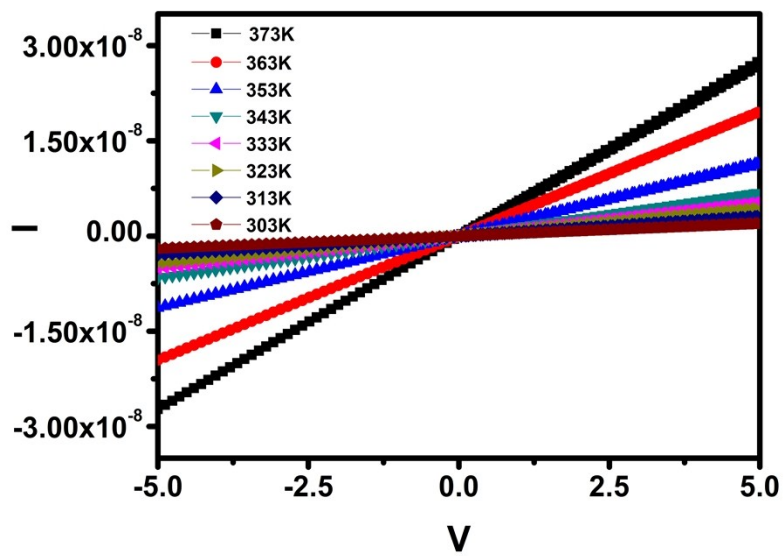

Figure S4. Temperature-dependent I-V curves of 1.

**Table S1.** Crystal Data and Structure Refinements for **1**

---

|                                                     |                                                                       |
|-----------------------------------------------------|-----------------------------------------------------------------------|
| Temperature (K)                                     | 100                                                                   |
| Formula                                             | C <sub>4</sub> H <sub>14</sub> N <sub>2</sub> CdBr <sub>4</sub>       |
| Crystal system, Space group                         | Monoclinic, <i>P</i> 2 <sub>1</sub> / <i>c</i>                        |
| Cell parameters (Å)                                 | <i>a</i> = 9.5648 (6); <i>b</i> = 7.9073 (4);<br><i>c</i> = 7.9960(5) |
| <i>V</i> (Å <sup>3</sup> )                          | 591.99(2)                                                             |
| <i>Z</i>                                            | 2                                                                     |
| $\rho_c$ (g/cm <sup>3</sup> )                       | 2.930                                                                 |
| <i>F</i> (000)                                      | 480                                                                   |
| Theta range (°)                                     | 3.9780- 29.1180                                                       |
| Limiting indices                                    | -11 ≤ <i>h</i> ≤ 9, -9 ≤ <i>k</i> ≤ 9, -9 ≤ <i>l</i> ≤ 8              |
| Reflections collected / unique                      | 1192 / 1099 [ <i>R</i> <sub>int</sub> = 0.041]                        |
| Completeness                                        | 99.15%                                                                |
| GOF.                                                | 1.044                                                                 |
| Final <i>R</i> indices [ <i>I</i> > 2σ( <i>I</i> )] | <i>R</i> <sub>1</sub> = 0.0277, <i>wR</i> <sub>2</sub> = 0.0632       |
| <i>R</i> indices (all data)                         | <i>R</i> <sub>1</sub> = 0.0308, <i>wR</i> <sub>2</sub> = 0.0647       |

---

**Table S2.** Bond Lengths of compound **1**.

| Atom | Atom             | Length/Å   | Atom | Atom             | Length/Å   |
|------|------------------|------------|------|------------------|------------|
| Cd1  | Br2              | 2.6409 (5) | Cd1  | Br3 <sup>3</sup> | 2.8543 (4) |
| Cd1  | Br2 <sup>1</sup> | 2.6409 (5) | Br3  | Cd1 <sup>4</sup> | 2.8543 (4) |
| Cd1  | Br3 <sup>1</sup> | 2.8257 (4) |      |                  |            |
| Cd1  | Br3              | 2.8257 (4) |      |                  |            |
| Cd1  | Br3 <sup>2</sup> | 2.8543 (4) |      |                  |            |

**Table S3.** Bond Angles of compound **1**.

| Atom             | Atom | Atom             | Angle/      | Atom             | Atom | Atom             | Angle/       |
|------------------|------|------------------|-------------|------------------|------|------------------|--------------|
| Br2              | Cd1  | Br2 <sup>1</sup> | 180.0       | Br3              | Cd1  | Br3 <sup>2</sup> | 89.677 (5)   |
| Br2              | Cd1  | Br3 <sup>1</sup> | 90.152 (14) | Br2              | Cd1  | Br3 <sup>3</sup> | 87.964 (14)  |
| Br2 <sup>1</sup> | Cd1  | Br3 <sup>1</sup> | 89.848 (14) | Br2 <sup>1</sup> | Cd1  | Br3 <sup>3</sup> | 92.036 (14)  |
| Br2              | Cd1  | Br3              | 89.848 (14) | Br3 <sup>1</sup> | Cd1  | Br3 <sup>3</sup> | 89.676 (5)   |
| Br2 <sup>1</sup> | Cd1  | Br3              | 90.152 (14) | Br3              | Cd1  | Br3 <sup>3</sup> | 90.323 (5)   |
| Br3 <sup>1</sup> | Cd1  | Br3              | 180.0       | Br3 <sup>2</sup> | Cd1  | Br3 <sup>3</sup> | 180.000 (12) |
| Br2              | Cd1  | Br3 <sup>2</sup> | 92.036 (14) | Cd1              | Br3  | Cd1 <sup>4</sup> | 163.714 (18) |
| Br2 <sup>1</sup> | Cd1  | Br3 <sup>2</sup> | 87.964 (14) |                  |      |                  |              |
| Br3 <sup>1</sup> | Cd1  | Br3 <sup>2</sup> | 90.324 (5)  |                  |      |                  |              |
